# Supplementary material for: Polysulfide-driven low charge overpotential for aprotic lithium–oxygen batteries
Source: Royal Society of Chemistry journal article supplement (doi:10.1039/c9ta00267g), 2019-01-01
Supplement: c9ta00267g1.pdf [file c9ta00267g1.pdf]

## Supporting information for

# Polysulfide-Driven Low Charge Overpotential for Aprotic Lithium-Oxygen Batteries

Yin Zhou<sup>a, b, c</sup>, Zhiyang Lyu<sup>b</sup>, Zhenjie Liu<sup>d</sup>, Wenrui Dai<sup>b, c</sup>, Rui Guo<sup>b</sup>, Jinlin Yang<sup>b, c</sup>, Xinhang Cui<sup>c, e</sup>, Yong Zhao<sup>f</sup>, Ming Lin<sup>g</sup>, Min Lai<sup>a</sup>, Zhangquan Peng<sup>d</sup> and Wei Chen<sup>b, c, e\*</sup>

<sup>1</sup>School of Physics and Optoelectronic Engineering, Nanjing University of Information Science & Technology, Nanjing 210044, Jiangsu, China

<sup>2</sup>Department of Chemistry, National University of Singapore, 3 Science Drive 3, 117543, Singapore.

<sup>3</sup>National University of Singapore (Suzhou) Research Institute, Suzhou, 215123, China.

<sup>4</sup>State Key Laboratory of Electroanalytical Chemistry, Changchun Institute of Applied Chemistry, Chinese Academy of Sciences, Changchun, Jilin, 130022, China

<sup>5</sup>Department of Physics, National University of Singapore, 2 Science Drive 3, 117543, Singapore.

<sup>6</sup>Institute for Advanced Study and Department of Physics, Nanchang University, Nanchang, 330031, P.R. China

<sup>7</sup>Institute of Materials Research and Engineering, A\*STAR (Agency for Science, Technology and Research), 2 Fusionopolis Way. Innovis, Singapore.

\*Corresponding Author E-mail: [phyew@nus.edu.sg](mailto:phyew@nus.edu.sg) (W Chen)

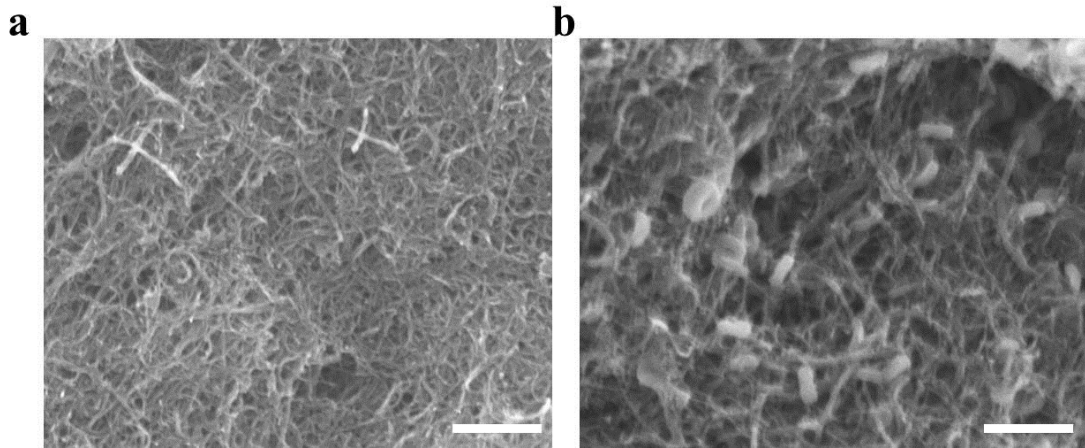

Figure S1. SEM images showing the morphology of CNT cathode (a) before charge and (b) after the 1<sup>st</sup> discharge. Scale bars, 200 nm (a), 500 nm (b).

Noted: The toroid-type products are observed after the 1<sup>st</sup> discharge process for CNT cathode.

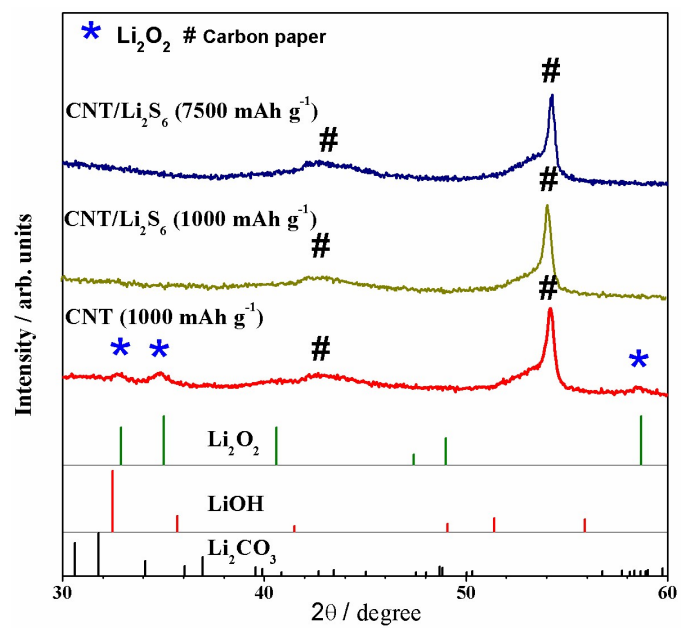

Figure S2. XRD patterns of CNT(1000  $\text{mAh g}^{-1}$ ) and CNT/ $\text{Li}_2\text{S}_6$  (1000  $\text{mAh g}^{-1}$  and 7500  $\text{mAh g}^{-1}$ ) after the 1<sup>st</sup> discharge.

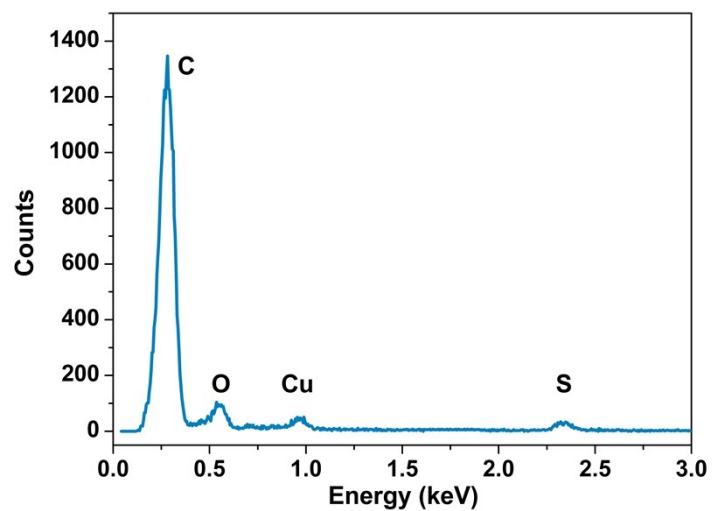

Figure S3. EDX result of the CNT/Li<sub>2</sub>S<sub>6</sub> after the 1<sup>st</sup> discharge.

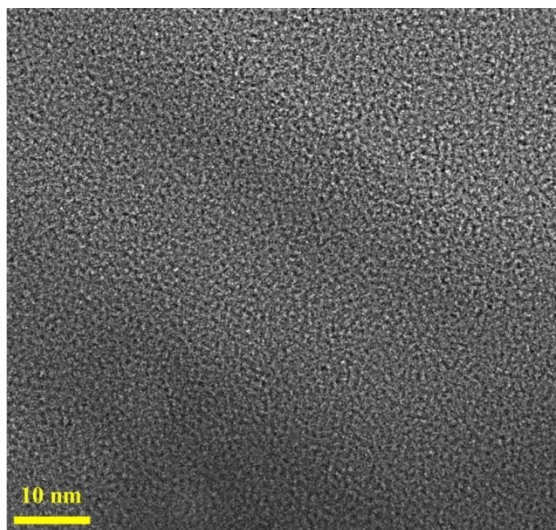

Figure S4. HR-TEM image for the 1<sup>st</sup> discharge products of CNT/Li<sub>2</sub>S<sub>6</sub> cathode.

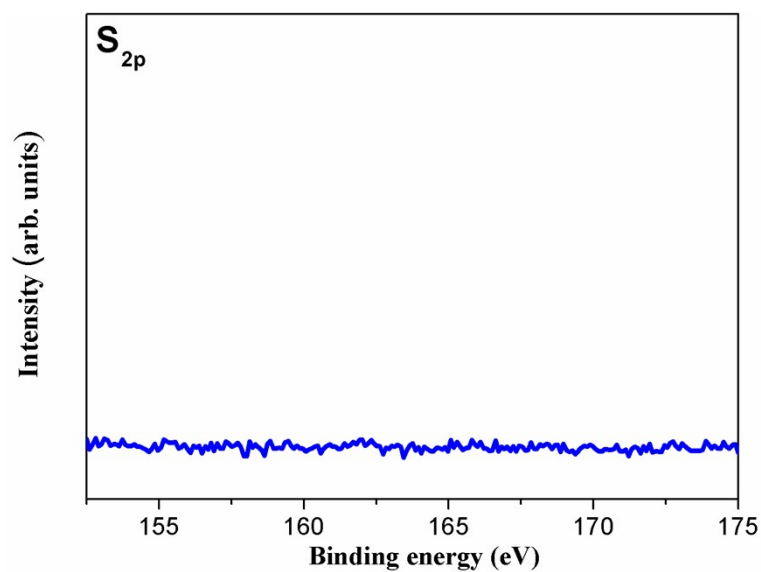

Figure S5. S 2p core-level XPS peak of the CNT cathode with  $\text{Li}_2\text{S}_6$  additives before charge.

CNT was impregnated in the TEGDME solvent with  $\text{Li}_2\text{S}_6$  additives, and then CNT was washed by acetonitrile and dried to do the XPS characterizations. We didn't observe any obvious S 2p in XPS, demonstrating that the  $\text{Li}_2\text{S}_6$  additives can be fully washed away by acetonitrile. Therefore, after the 1<sup>st</sup> discharge, the S signal observed on the CNT/ $\text{Li}_2\text{S}_6$  cathode mainly originates from the discharge product, not from the remained  $\text{Li}_2\text{S}_6$  additives.

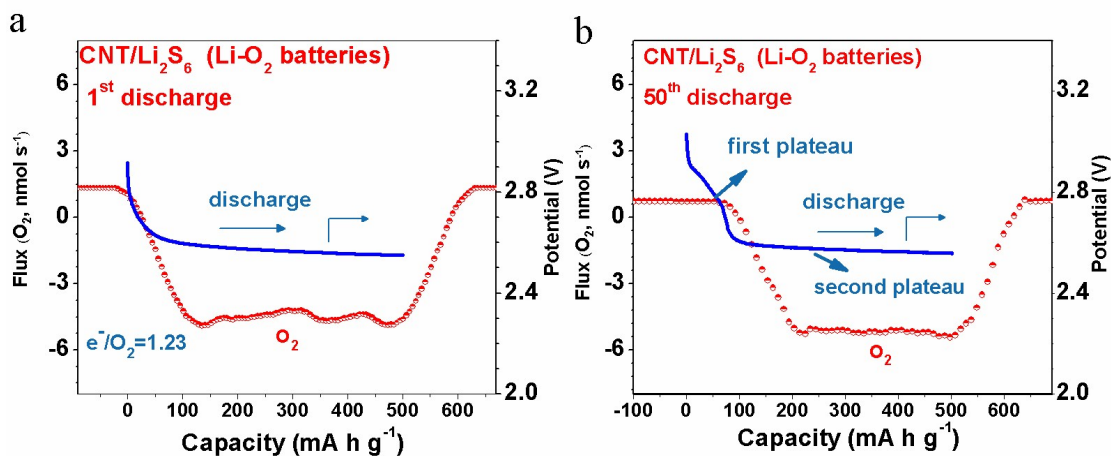

Figure S6. DEMS of CNT/Li<sub>2</sub>S<sub>6</sub> for (a) the 1<sup>st</sup> and (b) the 50<sup>th</sup> discharge process at current of 0.7 mA at a limited capacity of 500 mAh g<sup>-1</sup>.

The consumed ratio of electron and O<sub>2</sub> was confirmed by DEMS. O<sub>2</sub> is the only consumed gas and no evidence for the consumption of other gases (CO<sub>2</sub>, H<sub>2</sub> etc.) during discharge process. The number of electrons per O<sub>2</sub> molecule for CNT/Li<sub>2</sub>S<sub>6</sub> cathode is 1.23 (Figure S7a, Table S1). In addition, after the 50<sup>th</sup> discharge process, no O<sub>2</sub> consumption can be observed for the first platform.

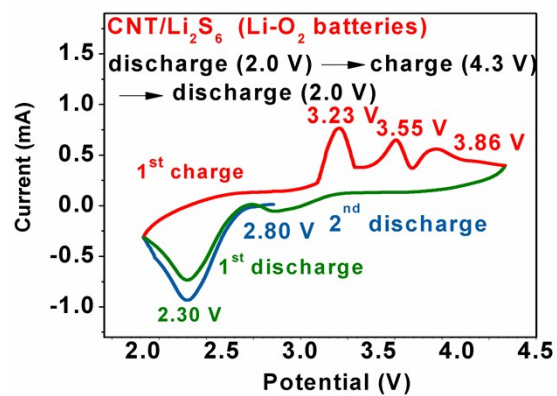

Figure S7. Cyclic voltammograms of CNT/Li<sub>2</sub>S<sub>6</sub> under O<sub>2</sub>, where CNT/Li<sub>2</sub>S<sub>6</sub> is first discharged to 2.0 V, then charged to 4.3 V, and finally the CNT/Li<sub>2</sub>S<sub>6</sub> cathode conducts the second discharge process to 2.0 V.



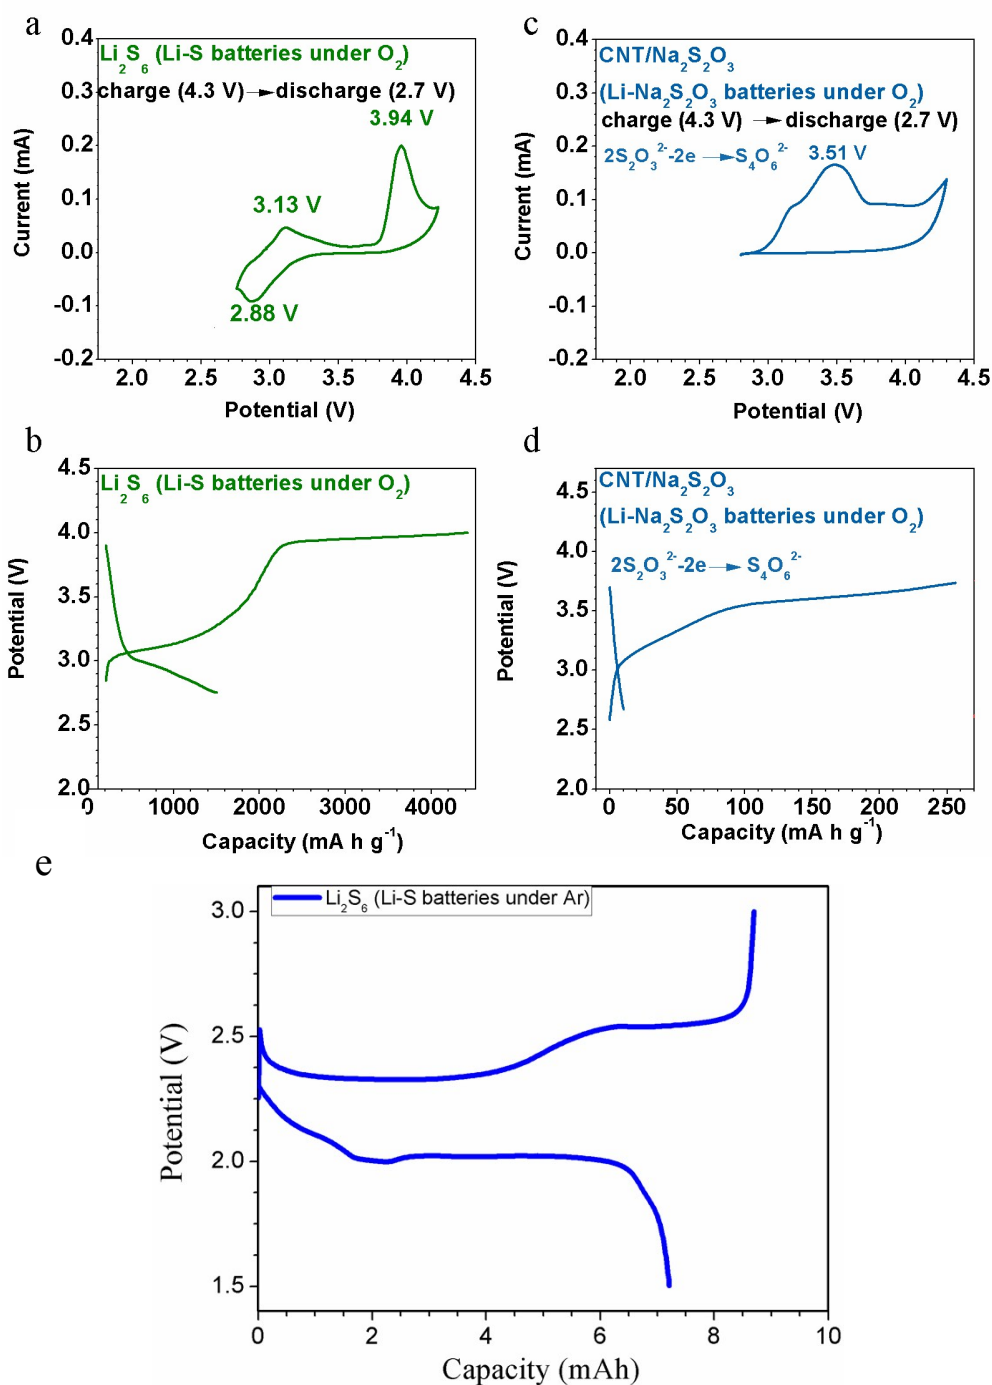

Figure S8. (a) Cyclic voltammograms and (b) the corresponding 1<sup>st</sup> charge-discharge curves (b) of  $\text{Li}_2\text{S}_6$  (Li-S batteries under  $\text{O}_2$ ), where  $\text{Li}_2\text{S}_6$  is first charged to 4.3 V, and then is discharged to 2.7 V; (c) cyclic voltammograms and (d) the corresponding 1<sup>st</sup> charge-discharge curve of  $\text{Na}_2\text{S}_2\text{O}_3$  (Li- $\text{Na}_2\text{S}_2\text{O}_3$  batteries under  $\text{O}_2$ ), where  $\text{Na}_2\text{S}_2\text{O}_3$  is first charged to 4.3 V, and then is discharged to 2.7 V, (e) discharge-charge curves of

the  $\text{Li}_2\text{S}_6$  under Ar (Li-S batteries under Ar), where  $\text{Li}_2\text{S}_6$  is first discharged to 1.5 V, and then is charged to 3.0 V.

Since  $\text{Li}_2\text{S}_4\text{O}_6$  is inactive in TEGDME solvent,<sup>[1]</sup> polysulfide ( $\text{Li}_2\text{S}_2$  and soluble  $\text{Li}_2\text{S}_6$ ) and thiosulfate ( $\text{Li}_2\text{S}_2\text{O}_3$ ) are main active materials for charge process. Therefore, the charge processes of polysulfide ( $\text{Li}_2\text{S}_2$  and  $\text{Li}_2\text{S}_6$ ) and  $\text{Li}_2\text{S}_2\text{O}_3$  are separately studied by assembling two kinds of batteries: Li-S batteries (active materials:  $\text{Li}_2\text{S}_6$  and  $\text{Li}_2\text{S}_2$ ) and Li/ $\text{Na}_2\text{S}_2\text{O}_3$  batteries (active materials:  $\text{Na}_2\text{S}_2\text{O}_3$ ). Because the ORR occurred at 2.7 V, we should limit the discharge voltage of Li-S batteries and Li/ $\text{Na}_2\text{S}_2\text{O}_3$  batteries above 2.7 V to separately study the discharge behavior. Therefore, we first charge the Li/ $\text{Na}_2\text{S}_2\text{O}_3$  batteries and Li-S batteries to 4.0 V followed by discharging to 2.7 V under  $\text{O}_2$  atmosphere.

For Li-S batteries, charge processes of  $\text{Li}_2\text{S}_2$  and  $\text{Li}_2\text{S}_6$  were separately conducted. In terms of charge process of  $\text{Li}_2\text{S}_6$  (Li-S batteries under  $\text{O}_2$ ), two typical peaks at 3.14 V and 3.94 V (Figure S8a) as well as corresponding charge curve (Figure S8b) are observed. The peak at 3.14 V corresponds to the oxidation of  $\text{Li}_2\text{S}_6$  to high-order polysulfide ( $\text{Li}_2\text{S}_x$ ,  $6 \leq x \leq 8$ ), while the peak at 3.94 V is ascribed to the oxidation of high-order polysulfide to sulfur (Figure S8a).<sup>[2]</sup> These two oxidation peaks are also identified from CNT/ $\text{Li}_2\text{S}_6$  cathode, implying that the peaks at 3.22 V and 3.86 V of CNT/ $\text{Li}_2\text{S}_6$  are due to oxidation of low-order polysulfide ( $\text{Li}_2\text{S}_2$  and  $\text{Li}_2\text{S}_6$ ) to high-order polysulfide (equation 3,  $\text{Li}_2\text{S}_x$ ,  $6 \leq x \leq 8$ ), and high-order polysulfide to sulfur, respectively.

For the oxidation process of  $\text{Na}_2\text{S}_2\text{O}_3$  (Li- $\text{Na}_2\text{S}_2\text{O}_3$  batteries), the peak at 3.51 V (Figure S8c and S8d) is due to the oxidation of  $\text{Li}_2\text{S}_2\text{O}_3$  to  $\text{Li}_2\text{S}_4\text{O}_6$ ,<sup>[3]</sup> and the capacity of 258 mAh  $\text{g}^{-1}$  is near the theoretical capacity of  $\text{Na}_2\text{S}_2\text{O}_3$  (339 mAh  $\text{g}^{-1}$ ). Meanwhile, similar peak (3.55 V) is detected by charge process of CNT/ $\text{Li}_2\text{S}_6$  cathode (Figure 3a), indicating that the middle peak of CNT/ $\text{Li}_2\text{S}_6$  is due to the oxidation of  $\text{Li}_2\text{S}_2\text{O}_3$  to  $\text{Li}_2\text{S}_4\text{O}_6$ .

For discharge process of Li-S batteries (active materials:  $\text{Li}_2\text{S}_6$ ) under  $\text{O}_2$ , the peak at 2.84 V is due to the reduction of sulfur to high-order polysulfide ( $\text{Li}_2\text{S}_x$ ,  $6 \leq x \leq 8$ ). In addition, inactive  $\text{Li}_2\text{S}_4\text{O}_6$  is inactive and cannot be reduced from 4.0 V to 2.7 V.<sup>[3]</sup> Therefore, the new reduction peak at 2.84 V of CNT/ $\text{Li}_2\text{S}_6$  belongs to the conversion of sulfur to high-order polysulfide ( $\text{Li}_2\text{S}_x$ ,  $6 \leq x \leq 8$ ).

It should be noted that the voltage of oxidation and reduction plateaus of  $\text{Li}_2\text{S}_6$  (Li-S batteries under  $\text{O}_2$ ) under  $\text{O}_2$  are different from the typical oxidation and reduction potential of lithium-sulfur (Li-S) batteries under Ar (Figure S8e). This is due to the fact that  $\text{Li}_2\text{S}_6$  (Li-S batteries under  $\text{O}_2$ ) is charged under  $\text{O}_2$  atmosphere, resulting in the obviously positive voltage shift of both oxidation and reduction plateau.

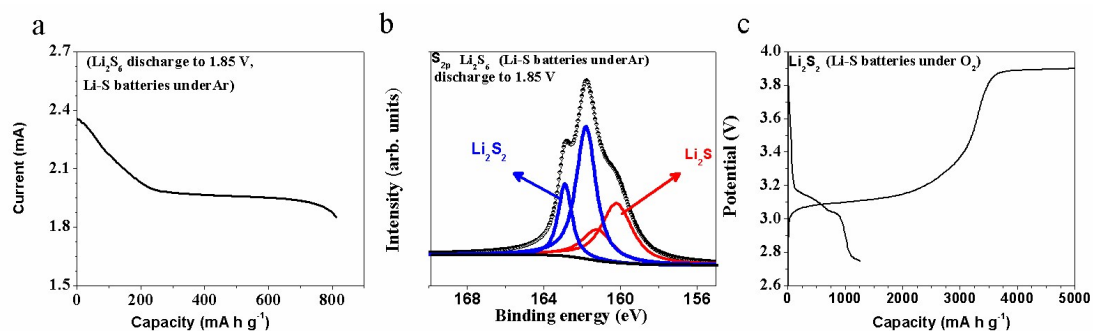

Figure S9. (a) Discharge curves of  $\text{Li}_2\text{S}_6$  (Li-S batteries under Ar) when discharging to 1.85 V; (b) S 2p core level XPS spectrum of the discharge product when  $\text{Li}_2\text{S}_6$  (Li-S batteries under Ar) is discharged to 1.85 V; (c) charge-discharge curves of  $\text{Li}_2\text{S}_2$  (Li-S batteries under  $\text{O}_2$ ).  $\text{Li}_2\text{S}_2$  is first charged to 4.0 V, and then is discharged to 2.7 V.

Note: The mass of active materials in Figure S9a and Figure S9c is calculated by the mass of  $\text{Li}_2\text{S}_6$ , and CNT respectively.

For the oxidation process of  $\text{Li}_2\text{S}_2$  under  $\text{O}_2$ , we obtained the  $\text{Li}_2\text{S}_2$  when  $\text{Li}_2\text{S}_6$  is discharged to 1.85 V under Ar. The main discharge product is  $\text{Li}_2\text{S}_2$  despite the existence of  $\text{Li}_2\text{S}$  (Li-S batteries under Ar, Figure S9b). The  $\text{Li}_2\text{S}_2$  is charged to 4.0 V, and then is discharged to 2.7 V under  $\text{O}_2$  (Li-S batteries under  $\text{O}_2$ ). During charge process, the platform at 3.14 V is due to the oxidation of  $\text{Li}_2\text{S}_2$  to high-order polysulfide (Figure 9c,  $\text{Li}_2\text{S}_x$ ,  $6 \leq x \leq 8$ ), while the platform at 3.89 V is due to the oxidation of high-order polysulfide (Figure 9c,  $\text{Li}_2\text{S}_x$ ,  $6 \leq x \leq 8$ ) to sulfur. For discharge process, the discharge process from 3.2 V to 2.7 V is due to the reduction of sulfur to high-order polysulfide (Figure 9c,  $\text{Li}_2\text{S}_x$ ,  $6 \leq x \leq 8$ )

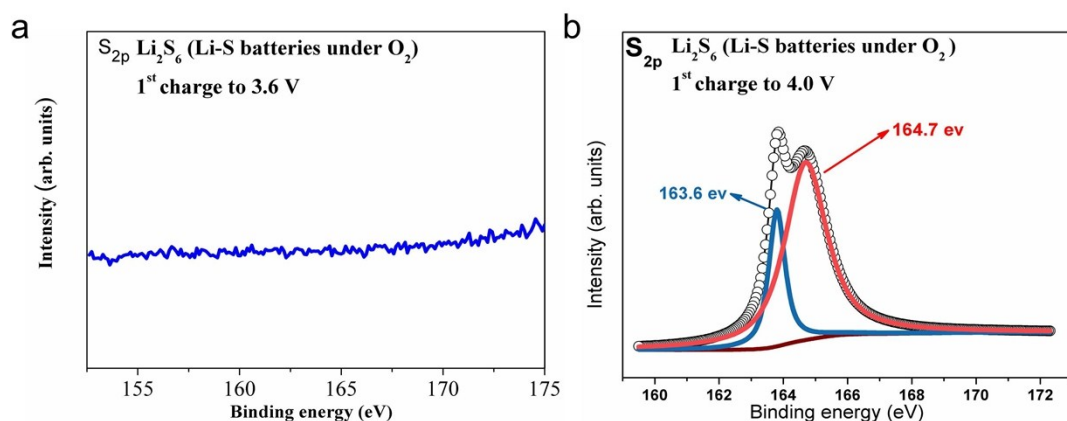

Figure S10. The  $\text{Li}_2\text{S}_6$  additives were charged to 3.6 V and 4.0 V under  $\text{O}_2$ , respectively. (a) S 2p core level XPS spectrum of the discharge product when  $\text{Li}_2\text{S}_6$  (under  $\text{O}_2$ ) is charged to 3.6 V; (b) S 2p core level XPS spectrum of the discharge products when  $\text{Li}_2\text{S}_6$  (under  $\text{O}_2$ ) is charged to 4.0 V.

We separately charged the  $\text{Li}_2\text{S}_6$  (Li-S batteries under  $\text{O}_2$ ) to 3.6 V and 4.0 V. No S signal can be identified in XPS results when  $\text{Li}_2\text{S}_6$  is charged to 3.6 V, indicating the charge process of  $\text{Li}_2\text{S}_6$  from 3.0 V to 3.6 V is due to oxidation of  $\text{Li}_2\text{S}_6$  to soluble high-order polysulfide ( $\text{Li}_2\text{S}_x$ ,  $6 \leq x \leq 8$ ). Due to high solubility of high-order polysulfide, high-order polysulfide is totally washed by acetonitrile and cannot be detected by XPS (Figure S10a). When  $\text{Li}_2\text{S}_6$  is charged to 4.0 V (Li-S batteries under  $\text{O}_2$ ), the typical  $\text{S}_{2p}$  peaks of charged products are in consistence with  $\text{S}_8$  molecules. This result indicated that charge process of  $\text{Li}_2\text{S}_6$  from 3.6 V to 4.0 V was due to oxidation of high-order polysulfide ( $\text{Li}_2\text{S}_x$ ,  $6 \leq x \leq 8$ ) to sulfur.

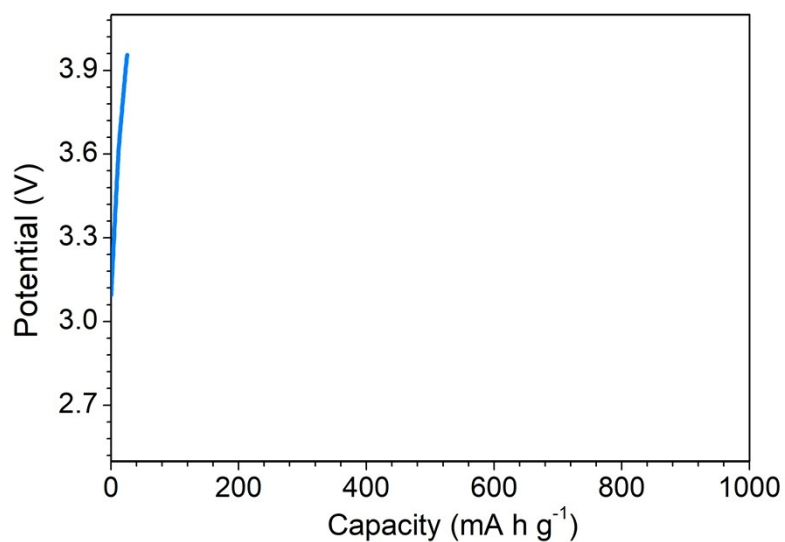

Figure S11. Charge profile of the CNT/S cathode under O<sub>2</sub>.

The CNT/S cathode was charged from 3.0 V to 4.0 V under O<sub>2</sub>. The voltage increases sharply and no obvious platform can be observed, indicating that sulfur is stable and cannot be oxidized from 3.0 V-4.0 V under O<sub>2</sub> atmosphere.

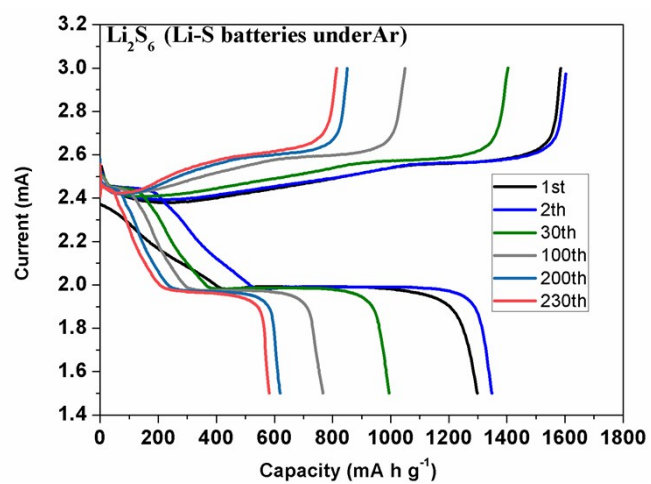

Figure S12. Cycle performance of  $\text{Li}_2\text{S}_6$  (Li-S batteries under Ar). The higher charge capacity compared to the discharge capacity is due to the shuttle effect.

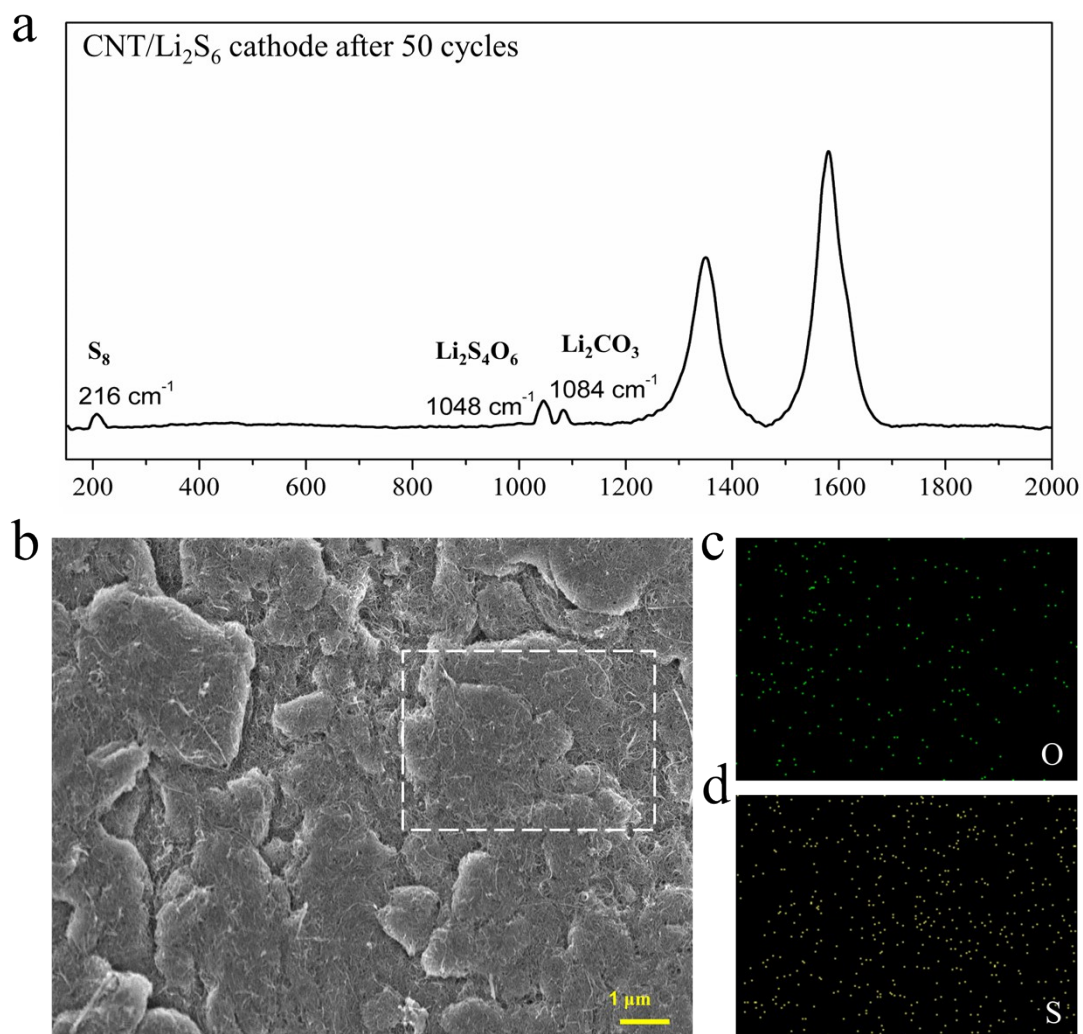

Figure S13. (a) Raman spectra of CNT/Li<sub>2</sub>S<sub>6</sub> cathode after 50 cycles; (b) SEM images of CNT/Li<sub>2</sub>S<sub>6</sub> cathode after 50<sup>th</sup> recharge; (c)-(d) EDX mapping of O and S for selected area in panel (b).



Table S1. O<sub>2</sub> electrochemistry quantified by DEMS: ratios of the number of electrons to oxygen molecules upon reduction (discharge process).

|                                      | Cycle number | discharge(e <sup>-</sup> /O <sub>2</sub> ) |
|--------------------------------------|--------------|--------------------------------------------|
| CNT(Li <sub>2</sub> S <sub>6</sub> ) | 1            | 1.23                                       |
|                                      | 50           | 1.13                                       |

Table S2. Summary of carbon-based catalysts and their related performance.

| Catalyst                                              | Charge overpotential                  | Cycle performance                                                     | Ref       |
|-------------------------------------------------------|---------------------------------------|-----------------------------------------------------------------------|-----------|
| Au@cracked carbon submicron tube                      | 1.3 V at 400 mA g <sup>-1</sup>       | 112 cycles at 400 mA g <sup>-1</sup> with 1000 mAh g <sup>-1</sup>    | [4]       |
| Reduced graphene oxide (LiI)                          | around 0 V at 100 mA g <sup>-1</sup>  | 2000 cycles at 1000 mA g <sup>-1</sup> with 1000 mAh g <sup>-1</sup>  | [5]       |
| Carbonized and activated wood/Ru                      | 0.72 V at 0.1 mA cm <sup>-1</sup>     | 100 cycles at 0.1 mA cm <sup>-1</sup> with 0.6 mAh cm <sup>-1</sup>   | [6]       |
| Mesoporous Carbon Nanocube/Ru<br>(LiNO <sub>3</sub> ) | 0.14 V at 200 mA g <sup>-1</sup>      | 120 cycles at 400 mA g <sup>-1</sup> with 1000 mAh g <sup>-1</sup>    | [7]       |
| Polyethylene film@CNT                                 | 0.4 V at 2000 mA g <sup>-1</sup>      | 610 cycles at 400 mA g <sup>-1</sup> with 1000 mAh g <sup>-1</sup>    | [8]       |
| Ketjen Black (UH <sub>2</sub> O <sub>2</sub> )        | 0.26 V at 100 mA g <sup>-1</sup>      | 50 cycles at 500 mA g <sup>-1</sup> with 1000 mAh g <sup>-1</sup>     | [9]       |
| Textile                                               | 0.75 V at 0.1 mA cm <sup>-1</sup>     | 50 cycles at 0.1 mA cm <sup>-1</sup> with 1.0 mAh cm <sup>-1</sup>    | [10]      |
| ZnO/VACNTs                                            | 0.63 V at 0.1 mA cm <sup>-1</sup>     | 112 cycles at 0.1 mA cm <sup>-1</sup> with 1000 mAh g <sup>-1</sup>   | [11]      |
| <b>CNT/Li<sub>2</sub>S<sub>6</sub></b>                | <b>0.19 V at 0.5 A g<sup>-1</sup></b> | <b>147 cycles at 0.5 A g<sup>-1</sup> with 500 mAh g<sup>-1</sup></b> | This work |

## References

- [1] G. K. Druschel, R. J. Hamers, J. F. Banfield, *Geochim. Cosmochim. Acta* 2003, 67, 4457.
- [2] T. Chen, L. Ma, B. Cheng, R. Chen, Y. Hu, G. Zhu, Y. Wang, J. Liang, Z. Tie, J. Liu, Z. Jin, *Nano Energy* 2017, 38, 239.
- [3] J. Feng, D. C. Johnson, S. N. Lowery, *J. Electrochem. Soc.* 1995, 142, 2618; A. Pedraza, I. Villegas, P. Freund, B. Chornik, *J. Electroanal. Chem.* 1988, 250, 443.
- [4] F. Tu, J. Hu, J. Xie, G. Cao, S. Zhang, S. A. Yang, X. Zhao, H. Y. Yang, *Advanced Functional Materials* 2016, 26, 7725.
- [5] T. Liu, M. Leskes, W. Yu, A. J. Moore, L. Zhou, P. M. Bayley, G. Kim, C. P. Grey, *Science* 2015, 350, 530.
- [6] H. Song, S. Xu, Y. Li, J. Dai, A. Gong, M. Zhu, C. Zhu, C. Chen, Y. Chen, Y. Yao, B. Liu, J. Song, G. Pastel, L. Hu, *Advanced Energy Materials* 2017, 1701203.
- [7] B. Sun, S. Chen, H. Liu, G. Wang, *Advanced Functional Materials* 2015, 25, 4436.
- [8] L. Wang, J. Pan, Y. Zhang, X. Cheng, L. Liu, H. Peng, *Adv Mater* 2017.
- [9] S. Wu, Y. Qiao, S. Yang, M. Ishida, P. He, H. Zhou, *Nat. Commun.* 2017, 8, 15607.
- [10] S. Xu, Y. Yao, Y. Guo, X. Zeng, S. D. Lacey, H. Song, C. Chen, Y. Li, J. Dai, Y. Wang, Y. Chen, B. Liu, K. Fu, K. Amine, J. Lu, L. Hu, *Adv Mater* 2017.
- [11] W. Fan, B. Wang, X. Guo, X. Kong, J. Liu, *Nano Energy* 2016, 27, 577.
